# Supplementary material for: Glycosylation of Trypanosoma cruzi TcI antigen reveals recognition by chagasic sera
Source: PubMed Central journal article supplement (PMC7532467; doi:10.1038/s41598-020-73390-9), 2020-10-02

**Glycosylation of *Trypanosoma cruzi* TcI antigen reveals recognition by chagasic sera.**

Niamh Murphy<sup>1\*</sup>, Barrie Rooney<sup>2,3\*</sup>, Tapan Bhattacharyya<sup>1</sup>, Omar Triana-Chavez<sup>4</sup>, Anja Krueger<sup>5</sup>, Stuart M. Haslam<sup>5</sup>, Victoria O'Rourke<sup>1</sup>, Magdalena Pańczuk<sup>1</sup>, Jemima Tsang<sup>1</sup>, Jack Bickford-Smith<sup>1</sup>, Robert H. Gilman<sup>6</sup>, Kevin Tetteh<sup>1</sup>, Chris Drakeley<sup>1</sup>, C. Mark Smales<sup>2</sup>, Michael A. Miles<sup>1</sup>

<sup>1</sup> Faculty of Infectious & Tropical Diseases, London School of Hygiene & Tropical Medicine, London, UK.

<sup>2</sup> Centre for Molecular Processing, School of Biosciences, University of Kent, Canterbury, Kent, UK

<sup>3</sup> TroZonX17, Kent, UK

<sup>4</sup> Instituto de Biología, Universidad de Antioquia, Medellín, Colombia

<sup>5</sup> Department of Life Sciences, Imperial College London, SW7 2AZ, London, UK

<sup>6</sup> Department of International Health, Johns Hopkins Bloomberg School of Public Health, Baltimore, USA.

\* These authors contributed equally.

Fig S1

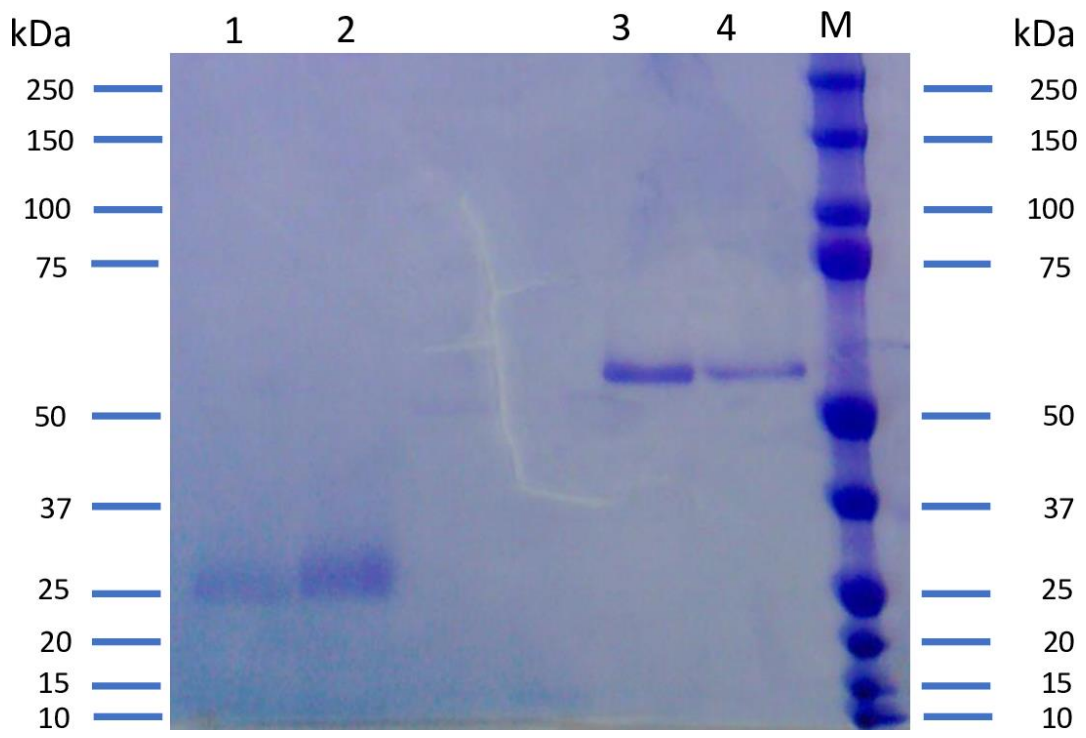

Fig S2

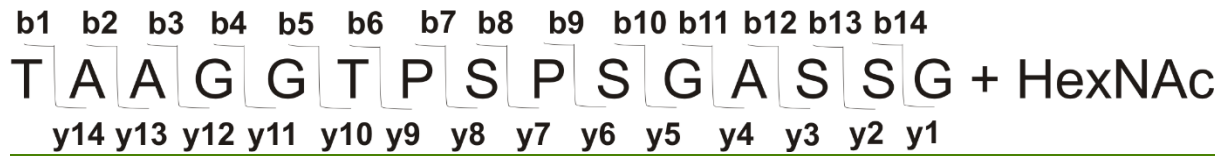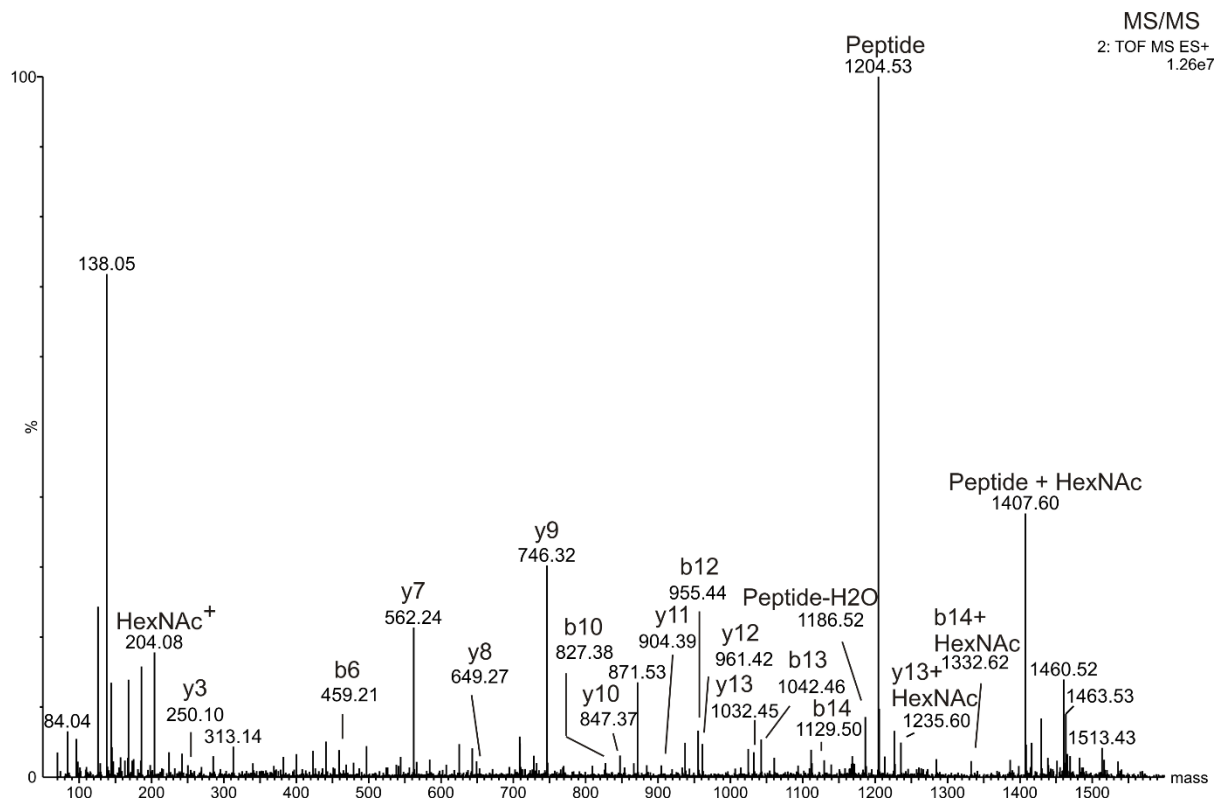

Supplement: 41598_2020_73390_MOESM1_ESM.pdf [file 41598_2020_73390_MOESM1_ESM.pdf]
